# Supplementary material for: Intermittent Fasting and High-Intensity Exercise Elicit Sexual-Dimorphic and Tissue-Specific Adaptations in Diet-Induced Obese Mice
Source: PubMed Central journal article supplement (PMC7353251; doi:10.3390/nu12061764), 2020-06-12
Supplement: nutrients-12-01764-s001.pdf [file nutrients-12-01764-s001.pdf]

SUPPLEMENTARY FIGURES AND TABLES

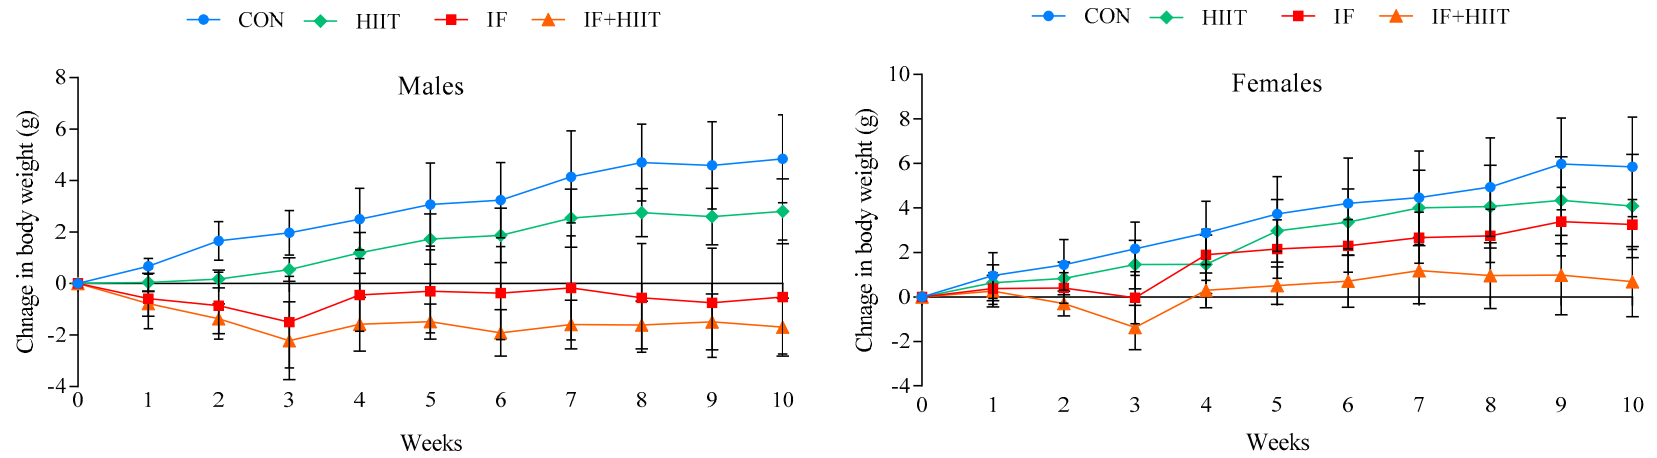

Figure S1. Change in body weight over the 10-weeks intervention period in (A) male and (B) females. Data is presented as mean of each group and error bars represent standard deviation.

Table S1. List of targeted genes in with full official names, NCBI reference sequence numbers and Qiagen catalogue number.

| <b>Gene symbol</b>             | <b>Official full name</b>                                            | <b>Marker</b>                            | <b>NCBI reference sequence number</b> | <b>Qiagen Catalogue number</b> |
|--------------------------------|----------------------------------------------------------------------|------------------------------------------|---------------------------------------|--------------------------------|
| <i>ACTB</i>                    | $\beta$ -Actin, beta                                                 | House keeping                            | NM_007393                             | PPM02945                       |
| <i>AGRP</i>                    | Agouti related protein                                               | Orexigenic                               | NM_007427                             | PPM29573                       |
| <i>AMPK</i>                    | Protein kinase AMP-activated catalytic subunit $\alpha$ 2            | Energy sensor                            | NM_178143                             | PPM29410F                      |
| <i>AS160</i>                   | Akt substrate of 160 kDa                                             | Insulin signalling                       | NM_00108127                           | PPM40317A                      |
| <i>B2M</i>                     | Beta-2 microglobulin                                                 | House keeping                            | NM_009735                             | PPM03562A                      |
| <i>BDNF</i>                    | Brain derived neurotrophic factor                                    | Neuronal plasticity                      | NM_007540                             | PPM03006                       |
| <i>BiP</i>                     | Binding-Immunoglobulin Protein                                       | Endoplasmic reticulum stress             | NM_022310                             | PPM03586                       |
| <i>CIDEc</i>                   | Cell death-inducing DFFA-like effector c                             | Unilocular lipid droplet formation       | NM_178373                             | PPM25558B                      |
| <i>COX-IV</i>                  | Cytochrome c oxidase subunit 4 isoform 2                             | Oxidative metabolism                     | NM_053091                             | PPM32878E                      |
| <i>CPT1</i>                    | Carnitine palmitoyltransferase Ib                                    | Oxidative metabolism                     | NM_009948                             | PPM57688A                      |
| <i>CS</i>                      | Citrate synthase                                                     | Oxidative metabolism                     | NM_026444                             | PPM29621B                      |
| <i>FABP4</i>                   | Fatty acid binding protein 4, adipocyte                              | Fat mobilization                         | NM_024406                             | PPM04517A                      |
| <i>FOXO1</i>                   | Forkhead box O 1                                                     | Adipocyte differentiation and maturation | NM_019739                             | PPM03381C                      |
| <i>FTO</i>                     | Fat mass and obesity associated                                      | Obesity                                  | NM_011936                             | PPM39276                       |
| <i>GAPD</i>                    | Glyceraldehyde-3-phosphate dehydrogenase                             | House keeping                            | NM_008084                             | PPM02946                       |
| <i>HADH</i>                    | Hydroxyacyl-Coenzyme A dehydrogenase                                 | $\beta$ Oxidation                        | NM_008212                             | PPM35732B                      |
| <i>HIF1<math>\alpha</math></i> | Hypoxia inducible factor 1, alpha                                    | Hypoxia                                  | NM_010431                             | PPM03799C                      |
| <i>IL1<math>\beta</math></i>   | Interleukin 1 beta                                                   | Inflammation                             | NM_008361                             | PPM03109                       |
| <i>LEP</i>                     | Leptin                                                               | Obesity                                  | NM_008493                             | PPM03504B                      |
| <i>MAFbx</i>                   | F-box protein 32                                                     | Muscle remodelling/atrophy               | NM_026346                             | PPM38061A                      |
| <i>MuRF1</i>                   | Muscle RING finger 1                                                 | Muscle remodelling/atrophy               | NM_00103904                           | PPM61645B                      |
| <i>NPY</i>                     | Neuropeptide Y                                                       | Orexigenic                               | NM_023456                             | PPM04323                       |
| <i>PGC1<math>\alpha</math></i> | Peroxisome proliferator-activated receptor gamma coactivator 1-alpha | Energy sensing & mitochondrial function  | NR_027710                             | PPM03360I                      |
| <i>POMC</i>                    | Pro-opiomelanocortin-alpha                                           | Anorexigenic                             | NM_008895                             | PPM37114                       |
| <i>PPAR<math>\gamma</math></i> | Peroxisome proliferator activated receptor $\gamma$                  | Adipocyte differentiation & maturation   | NM_001127330                          | PPM05108C                      |
| <i>PPIA</i>                    | Peptidylprolyl isomerase A                                           | House keeping                            | NM_008907                             | PPM03717B                      |
| <i>SIRT1</i>                   | Sirtuin 1                                                            | Energy sensor                            | NM_001159589                          | PPM05054A                      |
| <i>TNF<math>\alpha</math></i>  | Tumor necrosis factor-alpha                                          | Inflammation                             | NM_013693                             | PPM03113G                      |

|               |                                                                    |                              |              |           |
|---------------|--------------------------------------------------------------------|------------------------------|--------------|-----------|
| <i>TRPV4</i>  | Transient receptor potential cation channel, subfamily V, member 4 | Inflammation                 | NM_022017    | PPM36070A |
| <i>UCP3</i>   | Uncoupling protein 3                                               | Fatty acid metabolism        | NM_009464    | PPM25342F |
| <i>XBP1us</i> | X-box binding protein 1 (unspliced)                                | Endoplasmic reticulum stress | NM_013842    | PPM84308A |
| <i>XBP1s</i>  | X-box binding protein 1 (spliced)                                  | Endoplasmic reticulum stress | NM_001271730 | PPM84307A |

Table S2. List of miRNAs analysed in adipose tissue, miRbase accession numbers and Qiagen miScript Primer Assay Catalog Numbers.

| Mature miRNA ID | Gene target                    | miRBase Accession No. | Qiagen miScript Primer Assay Catalog No. |
|-----------------|--------------------------------|-----------------------|------------------------------------------|
| mmu-miR-24-3p   | <i>FABP4</i>                   | MIMAT0000219          | MS00005922                               |
| mmu-miR-222-3p  | <i>HIF1<math>\alpha</math></i> | MIMAT0000670          | MS00007959                               |
| mmu-miR-143-3p  | Leptin                         | MIMAT0000247          | MS00001617                               |
| mmu-miR-145a-5p | <i>FOXO1</i>                   | MIMAT0000157          | MS00001631                               |
| mmu-miR-696     | <i>PGC1<math>\alpha</math></i> | MIMAT0003483          | MS00002870                               |
| mmu-miR-133a-3p | <i>TNF<math>\alpha</math></i>  | MIMAT0000145          | MS00007294                               |
| mmu-miR-133b-3p | <i>MuRF1</i>                   | MIMAT0000769          | MS00007301                               |

Table S3. Pearson correlation between hypothalamus gene markers with body composition and glucose parameters

|                 |         |                | AgRP   | NPY          | POMC   | BDNF   | TNF $\alpha$ | IL1B   | BiP    | FTO    | XBPs/XBPus |
|-----------------|---------|----------------|--------|--------------|--------|--------|--------------|--------|--------|--------|------------|
| Body Wt         | Males   | r              | -0.190 | 0.093        | 0.091  | -0.036 | 0.318        | -0.261 | 0.321  | -0.145 | 0.248      |
|                 |         | <i>p value</i> | 0.343  | 0.639        | 0.651  | 0.850  | 0.093        | 0.180  | 0.083  | 0.446  | 0.178      |
|                 | Females | r              | -0.188 | <b>0.402</b> | -0.125 | -0.021 | 0.147        | -0.049 | -0.096 | -0.324 | 0.140      |
|                 |         | <i>p value</i> | 0.266  | 0.014        | 0.504  | 0.900  | 0.386        | 0.773  | 0.585  | 0.058  | 0.395      |
| Fat Mass        | Males   | r              | -0.090 | 0.091        | 0.087  | 0.014  | 0.250        | -0.313 | 0.313  | 0.026  | 0.237      |
|                 |         | <i>p value</i> | 0.657  | 0.646        | 0.667  | 0.942  | 0.192        | 0.104  | 0.093  | 0.890  | 0.199      |
|                 | Females | r              | -0.198 | <b>0.422</b> | -0.172 | -0.032 | 0.108        | -0.038 | -0.092 | -0.366 | 0.146      |
|                 |         | <i>p value</i> | 0.241  | 0.009        | 0.356  | 0.849  | 0.524        | 0.821  | 0.599  | 0.031  | 0.375      |
| Lean mass       | Males   | r              | -0.293 | 0.013        | 0.019  | -0.139 | 0.241        | 0.032  | 0.116  | -0.417 | 0.099      |
|                 |         | <i>p value</i> | 0.138  | 0.950        | 0.925  | 0.464  | 0.208        | 0.870  | 0.541  | 0.022  | 0.596      |
|                 | Females | r              | -0.057 | 0.160        | 0.149  | 0.081  | 0.300        | -0.061 | -0.100 | -0.012 | 0.107      |
|                 |         | <i>p value</i> | 0.738  | 0.345        | 0.425  | 0.635  | 0.072        | 0.718  | 0.568  | 0.944  | 0.516      |
| Fasting glucose | Males   | r              | -0.188 | 0.060        | -0.053 | -0.191 | 0.237        | 0.310  | 0.120  | -0.385 | 0.037      |
|                 |         | <i>p value</i> | 0.348  | 0.762        | 0.792  | 0.312  | 0.217        | 0.108  | 0.527  | 0.036  | 0.843      |
|                 | Females | r              | -0.160 | 0.037        | -0.068 | -0.130 | 0.049        | -0.011 | 0.130  | -0.108 | -0.008     |
|                 |         | <i>p value</i> | 0.344  | 0.828        | 0.718  | 0.444  | 0.775        | 0.946  | 0.455  | 0.537  | 0.961      |
| Glucose AUC     | Males   | r              | -0.170 | 0.426        | -0.066 | -0.227 | 0.202        | 0.145  | -0.084 | -0.317 | -0.148     |
|                 |         | <i>p value</i> | 0.396  | 0.024        | 0.745  | 0.229  | 0.295        | 0.461  | 0.661  | 0.088  | 0.426      |
|                 | Females | r              | -0.236 | 0.093        | -0.001 | -0.161 | -0.030       | 0.032  | -0.053 | -0.309 | 0.344      |
|                 |         | <i>p value</i> | 0.159  | 0.586        | 0.997  | 0.341  | 0.859        | 0.850  | 0.760  | 0.071  | 0.032      |
| HOMA-IR         | Males   | r              | -0.038 | -0.060       | 0.091  | -0.121 | <b>0.501</b> | 0.055  | 0.290  | -0.055 | 0.292      |
|                 |         | <i>p value</i> | 0.851  | 0.763        | 0.651  | 0.525  | 0.006        | 0.780  | 0.120  | 0.773  | 0.111      |
|                 | Females | r              | -0.053 | 0.113        | -0.107 | 0.032  | 0.050        | -0.060 | 0.043  | -0.075 | -0.155     |
|                 |         | <i>p value</i> | 0.755  | 0.506        | 0.568  | 0.849  | 0.768        | 0.726  | 0.808  | 0.670  | 0.347      |

Table S4. Pearson correlation between adipose tissue gene markers with body composition, glucose parameters and plasma lipids.

|                 |         |                | CIDEc         | Leptin       | PPAR          | FOXO         | HADH          | FABP4         | SIRT1         | TRPV          | HIF1a        |
|-----------------|---------|----------------|---------------|--------------|---------------|--------------|---------------|---------------|---------------|---------------|--------------|
| Body Wt         | Males   | r              | -0.157        | <b>0.722</b> | <b>-0.459</b> | -0.069       | -0.281        | <b>-0.596</b> | -0.213        | 0.038         | <b>0.658</b> |
|                 |         | <i>p value</i> | 0.425         | 0.000        | 0.014         | 0.726        | 0.147         | 0.001         | 0.258         | 0.841         | 0.000        |
|                 | Females | r              | -0.005        | <b>0.671</b> | -0.157        | 0.340        | -0.126        | -0.112        | 0.015         | 0.064         | <b>0.319</b> |
|                 |         | <i>p value</i> | 0.976         | 0.000        | 0.367         | 0.053        | 0.479         | 0.544         | 0.930         | 0.713         | 0.070        |
| Fat Mass        | Males   | r              | -0.107        | <b>0.785</b> | <b>-0.454</b> | -0.008       | -0.185        | <b>-0.574</b> | -0.178        | 0.075         | <b>0.685</b> |
|                 |         | <i>p value</i> | 0.588         | 0.000        | 0.015         | 0.969        | 0.345         | 0.001         | 0.347         | 0.687         | 0.000        |
|                 | Females | r              | 0.072         | <b>0.730</b> | -0.129        | <b>0.366</b> | -0.087        | -0.063        | 0.058         | 0.106         | <b>0.349</b> |
|                 |         | <i>p value</i> | 0.692         | 0.000        | 0.462         | 0.036        | 0.625         | 0.733         | 0.735         | 0.541         | 0.047        |
| Lean mass       | Males   | r              | -0.179        | 0.107        | -0.196        | -0.148       | -0.324        | -0.258        | -0.146        | -0.051        | 0.149        |
|                 |         | <i>p value</i> | 0.363         | 0.576        | 0.317         | 0.451        | 0.093         | 0.177         | 0.443         | 0.786         | 0.458        |
|                 | Females | r              | <b>-0.358</b> | 0.218        | -0.226        | 0.159        | -0.290        | -0.295        | -0.206        | -0.149        | 0.075        |
|                 |         | <i>p value</i> | 0.041         | 0.208        | 0.192         | 0.378        | 0.096         | 0.101         | 0.222         | 0.387         | 0.677        |
| Fasting glucose | Males   | r              | -0.289        | 0.098        | -0.296        | -0.153       | -0.373        | <b>-0.417</b> | -0.343        | -0.114        | 0.137        |
|                 |         | <i>p value</i> | 0.136         | 0.605        | 0.126         | 0.437        | 0.051         | 0.024         | 0.064         | 0.542         | 0.495        |
|                 | Females | r              | <b>-0.507</b> | -0.111       | -0.328        | -0.151       | <b>-0.564</b> | <b>-0.412</b> | <b>-0.416</b> | -0.300        | 0.082        |
|                 |         | <i>p value</i> | 0.003         | 0.526        | 0.055         | 0.401        | 0.001         | 0.019         | 0.010         | 0.076         | 0.650        |
| Glucose AUC     | Males   | r              | -0.030        | <b>0.511</b> | <b>-0.394</b> | 0.200        | 0.049         | <b>-0.416</b> | -0.187        | 0.076         | <b>0.484</b> |
|                 |         | <i>p value</i> | 0.881         | 0.004        | 0.038         | 0.307        | 0.806         | 0.025         | 0.322         | 0.684         | 0.011        |
|                 | Females | r              | -0.274        | 0.279        | -0.180        | 0.191        | -0.177        | -0.229        | -0.264        | -0.074        | 0.163        |
|                 |         | <i>p value</i> | 0.123         | 0.105        | 0.302         | 0.287        | 0.316         | 0.207         | 0.114         | 0.667         | 0.366        |
| HOMA-IR         | Males   | r              | -0.306        | 0.156        | -0.160        | -0.340       | <b>-0.451</b> | <b>-0.387</b> | -0.076        | -0.225        | 0.087        |
|                 |         | <i>p value</i> | 0.114         | 0.411        | 0.417         | 0.077        | 0.016         | 0.038         | 0.689         | 0.225         | 0.666        |
|                 | Females | r              | -0.283        | 0.089        | -0.130        | 0.050        | <b>-0.384</b> | -0.322        | <b>-0.375</b> | <b>-0.383</b> | -0.080       |
|                 |         | <i>p value</i> | 0.111         | 0.611        | 0.455         | 0.783        | 0.025         | 0.073         | 0.022         | 0.021         | 0.657        |
| TAG             | Males   | r              | 0.256         | -0.121       | 0.118         | 0.246        | -0.045        | -0.127        | -0.129        | 0.270         | -0.069       |
|                 |         | <i>p value</i> | 0.198         | 0.532        | 0.560         | 0.206        | 0.819         | 0.512         | 0.504         | 0.149         | 0.734        |
|                 | Females | r              | 0.126         | 0.102        | -0.328        | 0.118        | -0.029        | 0.320         | 0.229         | 0.074         | 0.029        |
|                 |         | <i>p value</i> | 0.487         | 0.558        | 0.054         | 0.514        | 0.870         | 0.074         | 0.173         | 0.667         | 0.872        |
| HDL             | Males   | r              | -0.182        | 0.067        | -0.274        | -0.056       | -0.166        | -0.216        | -0.297        | -0.112        | 0.063        |
|                 |         | <i>p value</i> | 0.355         | 0.726        | 0.159         | 0.779        | 0.398         | 0.261         | 0.111         | 0.549         | 0.756        |
|                 | Females | r              | 0.132         | <b>0.424</b> | <b>-0.424</b> | 0.048        | -0.016        | -0.081        | 0.125         | 0.189         | 0.186        |
|                 |         | <i>p value</i> | 0.464         | 0.011        | 0.011         | 0.791        | 0.928         | 0.658         | 0.460         | 0.271         | 0.300        |
| LDL             | Males   | r              | 0.029         | <b>0.600</b> | <b>-0.396</b> | 0.171        | -0.077        | <b>-0.490</b> | -0.089        | 0.254         | <b>0.679</b> |
|                 |         | <i>p value</i> | 0.882         | 0.001        | 0.037         | 0.385        | 0.696         | 0.007         | 0.639         | 0.168         | 0.000        |
|                 | Females | r              | 0.169         | <b>0.364</b> | 0.148         | 0.157        | 0.201         | 0.029         | 0.122         | 0.187         | 0.272        |
|                 |         | <i>p value</i> | 0.346         | 0.032        | 0.397         | 0.383        | 0.255         | 0.873         | 0.473         | 0.274         | 0.126        |

Table S5. Pearson correlation between muscle gene markers with body composition and glucose parameters

|                 |         |                | AMPK          | SIRT1         | PGC1         | CPT1          | CS     | COX4   | UCP3   | TNFa         | As160         | MURF   | MAFbx  |
|-----------------|---------|----------------|---------------|---------------|--------------|---------------|--------|--------|--------|--------------|---------------|--------|--------|
| Body Wt         | Males   | r              | 0.166         | -0.129        | <b>0.491</b> | -0.127        | 0.267  | 0.160  | -0.131 | <b>0.502</b> | -0.280        | 0.141  | -0.154 |
|                 |         | <i>p value</i> | 0.400         | 0.505         | 0.006        | 0.510         | 0.161  | 0.408  | 0.514  | 0.007        | 0.149         | 0.485  | 0.434  |
|                 | Females | r              | 0.019         | 0.044         | 0.304        | 0.267         | 0.031  | -0.046 | 0.187  | 0.140        | -0.199        | -0.029 | 0.023  |
|                 |         | <i>p value</i> | 0.913         | 0.806         | 0.076        | 0.105         | 0.861  | 0.796  | 0.283  | 0.444        | 0.267         | 0.867  | 0.898  |
| Fat Mass        | Males   | r              | 0.307         | -0.005        | <b>0.492</b> | -0.028        | 0.220  | 0.220  | -0.008 | <b>0.498</b> | -0.206        | 0.176  | -0.029 |
|                 |         | <i>p value</i> | 0.112         | 0.978         | 0.006        | 0.887         | 0.252  | 0.251  | 0.968  | 0.007        | 0.294         | 0.379  | 0.883  |
|                 | Females | r              | 0.029         | 0.111         | <b>0.342</b> | 0.282         | 0.046  | -0.084 | 0.186  | 0.110        | -0.171        | -0.013 | 0.035  |
|                 |         | <i>p value</i> | 0.867         | 0.534         | 0.044        | 0.086         | 0.791  | 0.638  | 0.285  | 0.547        | 0.341         | 0.938  | 0.842  |
| Lean mass       | Males   | r              | -0.229        | -0.294        | 0.163        | -0.266        | 0.173  | -0.099 | -0.312 | 0.174        | -0.232        | -0.056 | -0.326 |
|                 |         | <i>p value</i> | 0.240         | 0.122         | 0.390        | 0.163         | 0.369  | 0.609  | 0.113  | 0.377        | 0.235         | 0.782  | 0.091  |
|                 | Females | r              | -0.029        | -0.296        | 0.017        | 0.093         | -0.084 | 0.070  | 0.140  | 0.199        | -0.237        | -0.068 | -0.024 |
|                 |         | <i>p value</i> | 0.863         | 0.089         | 0.925        | 0.578         | 0.633  | 0.696  | 0.423  | 0.275        | 0.184         | 0.692  | 0.890  |
| Fasting glucose | Males   | r              | -0.119        | <b>-0.384</b> | 0.158        | <b>-0.403</b> | -0.028 | -0.109 | -0.335 | 0.276        | <b>-0.425</b> | -0.076 | -0.284 |
|                 |         | <i>p value</i> | 0.546         | 0.040         | 0.406        | 0.030         | 0.883  | 0.575  | 0.087  | 0.155        | 0.024         | 0.707  | 0.143  |
|                 | Females | r              | <b>-0.337</b> | -0.350        | -0.129       | -0.234        | -0.301 | -0.074 | -0.222 | 0.077        | <b>-0.373</b> | -0.272 | -0.254 |
|                 |         | <i>p value</i> | 0.042         | 0.042         | 0.459        | 0.157         | 0.080  | 0.676  | 0.200  | 0.677        | 0.033         | 0.108  | 0.141  |
| Glucose AUC     | Males   | r              | 0.035         | -0.234        | 0.164        | -0.360        | -0.036 | -0.158 | -0.203 | 0.249        | <b>-0.508</b> | 0.117  | -0.094 |
|                 |         | <i>p value</i> | 0.859         | 0.221         | 0.388        | 0.055         | 0.852  | 0.413  | 0.311  | 0.201        | 0.006         | 0.561  | 0.635  |
|                 | Females | r              | -0.167        | -0.143        | -0.003       | -0.110        | -0.169 | -0.097 | -0.052 | 0.379        | <b>-0.366</b> | 0.032  | 0.072  |
|                 |         | <i>p value</i> | 0.323         | 0.418         | 0.987        | 0.511         | 0.332  | 0.585  | 0.768  | 0.032        | 0.036         | 0.851  | 0.681  |
| HOMA-IR         | Males   | r              | -0.079        | -0.221        | 0.189        | -0.174        | 0.049  | 0.012  | -0.247 | 0.210        | -0.246        | -0.096 | -0.204 |
|                 |         | <i>p value</i> | 0.690         | 0.249         | 0.319        | 0.367         | 0.799  | 0.952  | 0.214  | 0.283        | 0.207         | 0.633  | 0.297  |
|                 | Females | r              | -0.115        | -0.284        | -0.108       | -0.070        | -0.343 | 0.011  | 0.119  | -0.206       | -0.192        | -0.079 | -0.144 |
|                 |         | <i>p value</i> | 0.499         | 0.104         | 0.537        | 0.678         | 0.044  | 0.950  | 0.496  | 0.258        | 0.285         | 0.649  | 0.408  |

Table S6. Pearson correlation between mRNA and miRNA expression in adipose tissue

| Gene   | miRNA      | Males  |         | Females |         |
|--------|------------|--------|---------|---------|---------|
|        |            | r      | P value | r       | P value |
| FABP4  | miR-24-3p  | 0.099  | 0.622   | -0.069  | 0.713   |
| HIF1   | miR-222-3p | 0.189  | 0.365   | 0.107   | 0.568   |
| Leptin | miR-143-3p | -0.096 | 0.627   | -0.295  | 0.096   |
| FOXO1  | miR-145-5p | 0.476  | 0.016   | -0.131  | 0.497   |

Table S7. Pearson correlation between mRNA and miRNA expression in muscle

| Gene  | miRNA    | Males  |         | Females       |         |
|-------|----------|--------|---------|---------------|---------|
|       |          | r      | p value | r             | p value |
| PGC1  | miR-696  | -0.065 | 0.752   | 0.488         | 0.009   |
| TNF   | miR-133a | -0.190 | 0.362   | <b>-0.404</b> | 0.041   |
| MURF1 | miR-133b | 0.105  | 0.627   | -0.270        | 0.164   |
